# Supplementary material for: Blood-brain barrier hyperpermeability precedes demyelination in the cuprizone model
Source: Springer Nature journal article supplement (doi:10.1186/s40478-017-0497-6), 2017-12-01
Supplement: MOESM1 [file 25666308]

**Table S1.** Primer sequences used for gene expression analyses.  
All primers used for expression analysis are intron-spanning.

| <b>Mouse</b>  | <b>Primer sequence 5'-3'; forward – reverse</b>       |
|---------------|-------------------------------------------------------|
| <i>Rplp0</i>  | GATGCCCAGGGAAGACAG – ACAATGAAGCATTGATAATCA            |
| <i>Hprt</i>   | TCCTCCTCAGACCGCTTTT – CCTGGTTCATCATCGCTAATC           |
| <i>Plp1</i>   | TCAGTCTATTGCCTTCCCTAGC – AGCATTCCATGGGAGAACAC         |
| <i>Car2</i>   | CAAGCACAACGGACCAGA – ATGAGCAGAGGCTGTAGG               |
| <i>Olig2</i>  | AGACCGAGCCAACACCAG – AAGCTCTCGAATGATCCTTCTTT          |
| <i>Aif1</i>   | TGTTTTTCTCCTCATAACATCAGAATC – CCGAGGAGACGTTCCAGCTAC   |
| <i>Lamp2</i>  | AAGGTGCAACCTTTTAATGTGAC – TGTCATCATCCAGCGAACAC        |
| <i>Gfap</i>   | TGCTCCTGCTTCGAGTCCTT – CAAGAGGAACATCGTGGTAAAGA        |
| <i>Ocln</i>   | TCCGTGAGGCCTTTTGAA – GGTGCATAATGATTGGGTTTG            |
| <i>Aqp4</i>   | TGGAGGATTGGGAGTCACC – TGAACACCAACTGGAAAGTGA           |
| <i>Cldn5</i>  | ACGGGAGGAGCGCTTTAC – GTTGGCGAACCCAGCAGAG              |
| <i>Tjp1</i>   | ATGCAGACCCAGCAAAGGT – TGACCAAGAGCTGGTTGTTTT           |
| <i>Cdh1</i>   | ATCCTCGCCCTGCTGATT – ACCACCGTTCTCCTCCGTA              |
| <i>Cdh5</i>   | TCATCAAACCCACGAAGTCC – GGTCTGTGGCCTCAATGTAGA          |
| <i>Pecam1</i> | GCTGGTGCTCTATGCAAGC – ATGGATGCTGTTGATGGTGA            |
| <i>Shh</i>    | TCCACTGTTCTGTGAAAGCAG – GGGACGTAAGTCCTTACCA           |
| <i>Cav1</i>   | ACCCCAAGCATCTCAACG – CACAGTGAAGGTGGTGAAGC             |
| <i>Cav2</i>   | CCTCACCAGCTCAACTCTCA – TCACATATTTGCTGATTTCAAAGAG      |
| <i>Abcb1a</i> | GGGCATTTACTTCAAACCTTGTC – TTTACAAGCTTCATTTCTAATTCAA   |
| <i>Abcb1b</i> | AGTGGACCCAACAGTACTCTGAT – GCACCAATCCCGGTGTAATA        |
| <i>Vegfa</i>  | TTACTGCTGTACCTCCACC – ACAGGACGGCTTGAAGATG             |
| <i>Hif1a</i>  | CATGATGGCTCCCTTTTTTCA – GTCACCTGGTTGCTGCAATA          |
| <i>Nos2</i>   | TGAACTTGAGCGAGGAGCA – TTCATGATAACGTTTCTGGCTCT         |
| <i>Nos3</i>   | CCAGTGCCCTGCTTCATC – GCAGGGCAAGTTAGGATCAG             |
| <i>Tgfb1</i>  | TGGAGCAACATGTGGAAGTCC – CAGCAGCCGGTTACCAAG            |
| <i>Mmp9</i>   | CAGAGGTAACCCACGTCAGC – GGGATCCACCTTCTGAGACTT          |
| <i>Tnf</i>    | TGCCTATGTCTCAGCCTCTTC – GAGGCCATTTGGGAAGTCT           |
| <i>Ifng</i>   | TCAAGTGGCATAGATGTGGAAGAA – TGGCTCTGCAGGATTTTCATG      |
| <i>Il1b</i>   | GCTACCAAACCTGGATATAATCAGGA – CCAGGTAGCTATGGTACTCCAGAA |
| <i>Il2</i>    | CGCAGAGGTCCAAGTTCATCT – CGCAGAGGTCCAAGTTCATCT         |
| <i>Il6</i>    | GCTACCAAACCTGGATATAATCAGGA – CCAGGTAGCTATGGTACTCCAGAA |
| <i>Ccl2</i>   | GCCTGCTGTTACAGTTGC – CAGGTGAGTGGGGCGTTA               |
| <i>Ccl3</i>   | TGCCCTTGCTGTTCTTCTCT – GTGGAATCTTCCGGCTGTAG           |
| <i>Ccl6</i>   | TCTTTATCCTTGTGGCTGTCC – TGGAGGGTTATAGCGACGAT          |
| <i>Cxcl10</i> | GCTGCCGTCAATTTCTGC – TCTCACTGGCCCGTCATC               |
| <b>Rat</b>    |                                                       |
| <i>Rplp0</i>  | GATGCCCAGGGAAGACAG – ACAATGAAGCATTGATAATCA            |
| <i>Hprt</i>   | GGTCCATTCCTATGACTGTAGATTTT – CAATCAAGACGTTCTTTCCAGTT  |
| <i>Ocln</i>   | ATCTAGAGCCTGGAGCAACG – GTCAAGGCTCCCAAGACAAG           |
| <i>Cldn5</i>  | GGTCTTTAGCCATGGGGTCT – CAGCCTACCAGACACAGCAC           |
| <i>Tjp1</i>   | GCATGTAGACCCAGCAAAGG – GGTGTTGTCTCATATTTCTCA          |
| <i>Pecam1</i> | CTCAGTCGGCTGACAAGATG – AGGCTTGCATAGAGCAGCAT           |
| <i>Abcb1a</i> | GAAAGGAATTTACTTCAAACCTTGTC – CACAAGCTTCATTTCTAATTCAA  |
| <i>Tgfb1</i>  | GGACTCTCCACCTGCAAGAC – GACTGGCGAGCCTTAGTTTG           |
| <i>Tnf</i>    | TGTCTGTGCCTCAGCCTCTTC – GAGCCCATTTGGGAAGTCT           |
| <i>Il6</i>    | CCCTTCAGGAACAGCTATGAA – ACAACATCAGTCCCAAGAAGG         |
| <i>Ccl2</i>   | CAGAAACCAGCCAACCTCTCA – GTGGGGCATTAACTGCATCT          |

**Table S2. Quantification of gene expression in corpus callosum.**

Wild type animals were treated with cuprizone for 5 days or 5 weeks or left untreated, and gene expression was determined in dissected corpus callosum. Data are expressed as mean of N=4-5 animals  $\pm$  SEM normalized to untreated controls. Significance (P value) was determined by Student's t-test (n.d., not determined).

| Gene symbol   | Fold expression  |                   | Significance to control (P) |                   |
|---------------|------------------|-------------------|-----------------------------|-------------------|
|               | 5 days cuprizone | 5 weeks cuprizone | 5 days cuprizone            | 5 weeks cuprizone |
| <i>Gfap</i>   | 4.26 $\pm$ 0.29  | 11.16 $\pm$ 0.78  | 0.0000                      | 0.0000            |
| <i>Aqp4</i>   | 1.28 $\pm$ 0.10  | 2.74 $\pm$ 0.01   | 0.1520                      | 0.0001            |
| <i>Aif1</i>   | 2.91 $\pm$ 0.25  | 7.55 $\pm$ 0.68   | 0.0000                      | 0.0000            |
| <i>Lamp2</i>  | 2.49 $\pm$ 0.09  | 3.25 $\pm$ 0.21   | 0.0001                      | 0.0000            |
| <i>Plp1</i>   | 0.04 $\pm$ 0.01  | 0.28 $\pm$ 0.07   | 0.0000                      | 0.0024            |
| <i>Car2</i>   | 1.02 $\pm$ 0.02  | 0.15 $\pm$ 0.03   | 0.8941                      | 0.0002            |
| <i>Olig2</i>  | 0.15 $\pm$ 0.01  | 0.39 $\pm$ 0.06   | 0.0000                      | 0.0043            |
| <i>Pecam1</i> | 0.18 $\pm$ 0.02  | 0.16 $\pm$ 0.01   | 0.0000                      | 0.0000            |
| <i>Ocln</i>   | 0.62 $\pm$ 0.01  | 0.55 $\pm$ 0.02   | 0.0019                      | 0.0000            |
| <i>Cldn5</i>  | 0.22 $\pm$ 0.01  | 0.33 $\pm$ 0.03   | 0.0003                      | 0.0122            |
| <i>Tjp1</i>   | 0.29 $\pm$ 0.05  | 0.27 $\pm$ 0.02   | 0.0008                      | 0.0016            |
| <i>Cdh1</i>   | 0.13 $\pm$ 0.01  | 0.88 $\pm$ 0.02   | 0.0032                      | 0.9066            |
| <i>Cdh5</i>   | 0.33 $\pm$ 0.02  | 0.50 $\pm$ 0.04   | 0.0000                      | 0.0001            |
| <i>Shh</i>    | 0.48 $\pm$ 0.09  | 0.14 $\pm$ 0.03   | 0.0379                      | 0.0005            |
| <i>Vegfa</i>  | 0.05 $\pm$ 0.01  | 0.08 $\pm$ 0.01   | 1.0000                      | 0.0316            |
| <i>Hif1a</i>  | 0.23 $\pm$ 0.03  | 0.55 $\pm$ 0.05   | 0.0732                      | 0.0000            |
| <i>Abcb1a</i> | 0.17 $\pm$ 0.01  | n.d.              | 0.0000                      | -                 |
| <i>Abcb1b</i> | 0.14 $\pm$ 0.01  | n.d.              | 0.0000                      | -                 |
| <i>Cav1</i>   | 0.59 $\pm$ 0.04  | 3.16 $\pm$ 0.16   | 0.0031                      | 0.0000            |
| <i>Cav2</i>   | 0.48 $\pm$ 0.04  | 0.69 $\pm$ 0.04   | 0.0002                      | 0.0018            |
| <i>Nos2</i>   | 1.48 $\pm$ 0.02  | 5.86 $\pm$ 0.33   | 0.0000                      | 0.0002            |
| <i>Nos3</i>   | 1.70 $\pm$ 0.03  | 4.07 $\pm$ 0.23   | 0.0002                      | 0.0000            |
| <i>Tgf1b</i>  | 1.13 $\pm$ 0.04  | 5.99 $\pm$ 0.60   | 0.1387                      | 0.0000            |
| <i>Tnf</i>    | 16.08 $\pm$ 1.85 | 58.85 $\pm$ 2.90  | 0.0000                      | 0.0000            |
| <i>Ifng</i>   | 1.58 $\pm$ 0.10  | 1.86 $\pm$ 0.20   | 0.0354                      | 0.0272            |
| <i>Il1b</i>   | 9.70 $\pm$ 0.67  | 58.52 $\pm$ 5.10  | 0.0000                      | 0.0000            |
| <i>Il2</i>    | 1.01 $\pm$ 0.01  | 1.37 $\pm$ 0.06   | 1.0000                      | 0.0369            |
| <i>Il6</i>    | 23.65 $\pm$ 1.01 | 9.43 $\pm$ 1.37   | 0.0000                      | 0.0001            |
| <i>Ccl2</i>   | 5.89 $\pm$ 0.40  | 273.20 $\pm$ 21.5 | 0.0000                      | 0.0000            |
| <i>Ccl3</i>   | 14.60 $\pm$ 1.41 | 231.15 $\pm$ 25.0 | 0.0000                      | 0.0000            |
| <i>Ccl6</i>   | 1.19 $\pm$ 0.05  | 144.95 $\pm$ 12.9 | 0.0629                      | 0.0000            |
| <i>Cxcl10</i> | 42.64 $\pm$ 4.86 | 62.67 $\pm$ 4.15  | 0.0000                      | 0.0000            |

**Table S3. Quantification of gene expression in cortex.**

Wild type animals were treated with cuprizone for 5 days or left untreated, and gene expression was determined in dissected cortex. Data are expressed as mean of N=4 animals  $\pm$  SEM normalized to untreated controls. Significance (P value) was determined by Student's t-test.

| <b>Gene symbol</b> | <b>Fold expression</b> | <b>Significance to control (P)</b> |
|--------------------|------------------------|------------------------------------|
| <i>Gfap</i>        | 4.24 $\pm$ 0.17        | 0.0000                             |
| <i>Aqp4</i>        | 0.99 $\pm$ 0.02        | 0.8514                             |
| <i>Aif1</i>        | 1.29 $\pm$ 0.03        | 0.0110                             |
| <i>Lamp2</i>       | 0.99 $\pm$ 0.04        | 0.8964                             |
| <i>Plp1</i>        | 0.17 $\pm$ 0.01        | 0.0000                             |
| <i>Car2</i>        | 1.06 $\pm$ 0.04        | 0.4867                             |
| <i>Olig2</i>       | 1.05 $\pm$ 0.03        | 0.6113                             |
| <i>Pecam1</i>      | 0.64 $\pm$ 0.05        | 0.0254                             |
| <i>Ocln</i>        | 0.76 $\pm$ 0.02        | 0.0034                             |
| <i>Cldn5</i>       | 0.49 $\pm$ 0.04        | 0.0009                             |
| <i>Tjp1</i>        | 0.58 $\pm$ 0.05        | 0.0060                             |
| <i>Cdh1</i>        | 1.09 $\pm$ 0.06        | 0.4855                             |
| <i>Cdh5</i>        | 0.99 $\pm$ 0.04        | 0.7884                             |
| <i>Shh</i>         | 1.06 $\pm$ 0.07        | 0.7815                             |
| <i>Vegfa</i>       | 1.07 $\pm$ 0.07        | 0.5894                             |
| <i>Abcb1a</i>      | 0.77 $\pm$ 0.03        | 0.0045                             |
| <i>Abcb1b</i>      | 1.01 $\pm$ 0.04        | 0.9245                             |
| <i>Cav1</i>        | 1.07 $\pm$ 0.05        | 0.5052                             |
| <i>Cav2</i>        | 0.76 $\pm$ 0.00        | 0.0298                             |
| <i>Nos2</i>        | 1.09 $\pm$ 0.01        | 0.0996                             |
| <i>Nos3</i>        | 1.08 $\pm$ 0.03        | 0.2227                             |
| <i>Tgf1b</i>       | 0.99 $\pm$ 0.11        | 0.8205                             |
| <i>Tnf</i>         | 2.36 $\pm$ 0.17        | 0.0005                             |
| <i>Ifng</i>        | 1.17 $\pm$ 0.10        | 0.4034                             |
| <i>Il1b</i>        | 2.30 $\pm$ 0.12        | 0.0017                             |
| <i>Il2</i>         | 1.03 $\pm$ 0.04        | 0.8974                             |
| <i>Il6</i>         | 2.12 $\pm$ 0.11        | 0.0010                             |
| <i>Ccl2</i>        | 3.43 $\pm$ 0.37        | 0.0014                             |
| <i>Ccl3</i>        | 5.44 $\pm$ 0.66        | 0.0001                             |
| <i>Ccl6</i>        | 1.06 $\pm$ 0.03        | 0.2905                             |
| <i>Cxcl10</i>      | 25.23 $\pm$ 1.12       | 0.0000                             |

**Table S4. Quantification of gene expression in acutely isolated cells.**

Wild type or CXCR3 deficient animals were treated with cuprizone for 5 or left untreated, and cells were isolated by magnetic bead assisted sorting followed by gene expression in samples of individual mice. Data are expressed as mean of N=3-4 animals  $\pm$  SEM normalized to untreated controls. Significance (P value) was determined by Student's t-test.

| Gene symbol              | Fold expression    |                 |                  |
|--------------------------|--------------------|-----------------|------------------|
|                          | Wild type          | CXCR3           | Significance (P) |
| <b>Oligodendroglia</b>   |                    |                 |                  |
| <i>Plp</i>               | 0.05 $\pm$ 0.01    | 0.05 $\pm$ 0.01 | 0.7238           |
| <i>Tnf</i>               | 4.46 $\pm$ 0.25    | 2.00 $\pm$ 0.26 | 0.0036           |
| <i>Il1b</i>              | 1.09 $\pm$ 0.03    | 1.21 $\pm$ 0.05 | 0.1515           |
| <i>Il6</i>               | 1.08 $\pm$ 0.03    | 0.26 $\pm$ 0.01 | 0.0000           |
| <i>Ccl2</i>              | 1.04 $\pm$ 0.02    | 1.08 $\pm$ 0.01 | 0.2341           |
| <b>Microglia</b>         |                    |                 |                  |
| <i>Aif1</i>              | 1.38 $\pm$ 0.08    | 1.26 $\pm$ 0.08 | 0.4431           |
| <i>Tnf</i>               | 3.13 $\pm$ 0.08    | 1.31 $\pm$ 0.10 | 0.0011           |
| <i>Il1b</i>              | 1.47 $\pm$ 0.15    | 1.10 $\pm$ 0.03 | 0.0954           |
| <i>Il6</i>               | 1.09 $\pm$ 0.02    | 1.08 $\pm$ 0.01 | 0.5409           |
| <i>Ccl2</i>              | 1.09 $\pm$ 0.04    | 1.18 $\pm$ 0.04 | 0.2709           |
| <b>Astroglia</b>         |                    |                 |                  |
| <i>Gfap</i>              | 18.37 $\pm$ 1.87   | 8.64 $\pm$ 0.52 | 0.0061           |
| <i>Tnf</i>               | 43.74 $\pm$ 4.51   | 1.36 $\pm$ 0.11 | 0.0000           |
| <i>Il1b</i>              | 24.49 $\pm$ 0.63   | 1.84 $\pm$ 0.31 | 0.0004           |
| <i>Il6</i>               | 11.55 $\pm$ 2.19   | 1.77 $\pm$ 0.13 | 0.0019           |
| <i>Ccl2</i>              | 116.96 $\pm$ 16.45 | 1.08 $\pm$ 0.09 | 0.0000           |
| <b>Endothelial cells</b> |                    |                 |                  |
| <i>Pecam1</i>            | 0.74 $\pm$ 0.01    | 1.04 $\pm$ 0.04 | 0.0099           |
| <i>Tnf</i>               | 6.48 $\pm$ 0.31    | 1.42 $\pm$ 0.10 | 0.0001           |
| <i>Il1b</i>              | 4.14 $\pm$ 0.71    | 1.16 $\pm$ 0.17 | 0.0131           |
| <i>Il6</i>               | 0.93 $\pm$ 0.06    | 0.02 $\pm$ 0.01 | 0.0001           |
| <i>Ccl2</i>              | 3.50 $\pm$ 0.39    | 1.40 $\pm$ 0.07 | 0.0049           |
